# Supplementary material for: Integrating a Next Generation Sequencing Panel into Clinical Practice in Ovarian Cancer
Source: PubMed Central journal article supplement — Yonsei Med J. 2019 Sep 16;60(10):914–23. doi: 10.3349/ymj.2019.60.10.914 (PMC6753345; doi:10.3349/ymj.2019.60.10.914), 2019-09-16
Supplement: ymj-60-914-s002.pdf [file ymj-60-914-s002.pdf]

**Supplementary Table 2.** Actionable Somatic Alterations

| <b>30 druggable genes suggested by MDACC</b> |                 |               |               |               |
|----------------------------------------------|-----------------|---------------|---------------|---------------|
| <i>ABL1</i>                                  | <i>CDK4</i>     | <i>FGFR2</i>  | <i>MET</i>    | <i>PIK3R1</i> |
| <i>AKT</i>                                   | <i>CDK6</i>     | <i>FLT3</i>   | <i>NRAS</i>   | <i>PTCH1</i>  |
| <i>ALK</i>                                   | <i>CDKN2A</i>   | <i>IDH1</i>   | <i>NTRK1</i>  | <i>PTEN</i>   |
| <i>BRAF</i>                                  | <i>EGFR</i>     | <i>KDR</i>    | <i>NTRK2</i>  | <i>PTPN11</i> |
| <i>BRCA1</i>                                 | <i>ERBB2</i>    | <i>KRAS</i>   | <i>PDGFRA</i> | <i>ROS1</i>   |
| <i>BRCA2</i>                                 | <i>FGFR1</i>    | <i>MDM2</i>   | <i>PIK3CA</i> | <i>SMO</i>    |
| <b>22 druggable genes suggested in TCGA</b>  |                 |               |               |               |
| <i>AKT1</i>                                  | <i>ERBB3</i>    | <i>MSTN</i>   | <i>STAT1</i>  |               |
| <i>AKT3</i>                                  | <i>HSP90AB1</i> | <i>NOS3</i>   | <i>STAT4</i>  |               |
| <i>CCNE1</i>                                 | <i>IGF1R</i>    | <i>POLB</i>   | <i>TERT</i>   |               |
| <i>CDK2</i>                                  | <i>KRAS</i>     | <i>RHEB</i>   | <i>VEGFA</i>  |               |
| <i>EPCAM</i>                                 | <i>MAPK15</i>   | <i>RICTOR</i> |               |               |
| <i>ERBB2</i>                                 | <i>MECOM</i>    | <i>RPTOR</i>  |               |               |
| <b>15 HRR related genes</b>                  |                 |               |               |               |
| <i>BRCA1</i>                                 | <i>BARD1</i>    | <i>RAD51B</i> |               |               |
| <i>BRCA2</i>                                 | <i>CDK12</i>    | <i>RAD51D</i> |               |               |
| <i>ATM</i>                                   | <i>CHEK1</i>    | <i>RAD54L</i> |               |               |
| <i>BRIP1</i>                                 | <i>CHEK2</i>    |               |               |               |
| <i>PALB2</i>                                 | <i>FANCL</i>    |               |               |               |
| <i>RAD51C</i>                                | <i>PPP2R2A</i>  |               |               |               |

MDACC, MD Anderson Cancer Center; TCGA, The Cancer Genome Atlas; HRR, homologous recombination repair.
